# Supplementary material for: Iron Content in Deep Gray Matter as a Function of Age Using Quantitative Susceptibility Mapping: A Multicenter Study
Source: PubMed Central journal article supplement (PMC7815653; doi:10.3389/fnins.2020.607705), 2021-01-06
Supplement: Data_Sheet_1.pdf [file Data_Sheet_1.pdf]

1

## *Supplementary Material*

2 **Table S1.** The iron content of the PUT, RN, and SN from the k-space cropped lower resolution images  
 3 were correlated with the iron content of the original images. The values of all the slopes and  $R^2$  are  
 4 given in Table S1. The  $R^2$  values are all close to unity indicating a very good agreement between the  
 5 measurements.

|            | Right side |       |        |       |        |       | Left side |       |        |       |        |       |
|------------|------------|-------|--------|-------|--------|-------|-----------|-------|--------|-------|--------|-------|
|            | Site 1     |       | Site 2 |       | Site 3 |       | Site 1    |       | Site 2 |       | Site 3 |       |
|            | slope      | $R^2$ | slope  | $R^2$ | slope  | $R^2$ | slope     | $R^2$ | slope  | $R^2$ | slope  | $R^2$ |
| <b>PUT</b> | 1.01       | 0.99  | 0.95   | 0.99  | 0.98   | 0.99  | 0.99      | 0.99  | 0.94   | 0.99  | 0.99   | 0.99  |
| <b>RN</b>  | 0.97       | 0.99  | 0.97   | 0.99  | 1      | 0.98  | 1         | 0.98  | 1.01   | 0.99  | 1.06   | 0.98  |
| <b>SN</b>  | 0.97       | 0.99  | 0.93   | 0.99  | 1.02   | 0.98  | 0.99      | 0.98  | 0.99   | 0.99  | 1.02   | 0.98  |

6 PUT (Putamen), RN (Red Nucleus), and SN (Substantia Nigra).

7 **Table S2.** Mean susceptibility (ppb), standard deviation and standard error of the different DGM in  
 8 subjects (age range 55-65 years) from 3 sites. The means in this age range are similar to each other for  
 9 all three sites across all the structures. It should be noted that the age ranges for each site are different  
 10 and narrow age ranges will lead to larger errors in the slope. When merged together into a single large  
 11 data set, the slopes are much more accurately determined.

|            |        | <b>RII analysis</b> |                  |                  | <b>Global analysis</b> |                 |                  |
|------------|--------|---------------------|------------------|------------------|------------------------|-----------------|------------------|
|            |        | <b>mean</b>         | <b>std devn*</b> | <b>std error</b> | <b>mean</b>            | <b>std devn</b> | <b>std error</b> |
| <b>CN</b>  | Site 1 | 95.99               | 7.79             | 1.25             | 46.16                  | 10.92           | 1.75             |
|            | Site 2 | 98.93               | 10.02            | 0.72             | 45.74                  | 12.87           | 0.92             |
|            | Site 3 | 99.23               | 8.32             | 1.25             | 44.27                  | 9.66            | 1.46             |
| <b>GP</b>  | Site 1 | 236.76              | 24.91            | 4.04             | 134.18                 | 23.98           | 3.84             |
|            | Site 2 | 229.52              | 21.6             | 1.69             | 115.46                 | 24.13           | 1.77             |
|            | Site 3 | 240.98              | 23.47            | 3.67             | 128.93                 | 21.16           | 3.25             |
| <b>PUT</b> | Site 1 | 142.35              | 14.04            | 2.25             | 74.16                  | 18.74           | 3.02             |
|            | Site 2 | 133.46              | 11.58            | 0.84             | 53.2                   | 18.04           | 1.3              |
|            | Site 3 | 133.17              | 11.94            | 1.8              | 50.26                  | 13.41           | 2.02             |
| <b>THA</b> | Site 1 | 29.37               | 7.13             | 1.14             | -0.06                  | 6.89            | 1.1              |
|            | Site 2 | 27                  | 7.91             | 0.57             | -10.07                 | 7.46            | 0.53             |
|            | Site 3 | 27.89               | 7.76             | 1.17             | -8.57                  | 6.64            | 1                |
| <b>PT</b>  | Site 1 | 81.01               | 6.99             | 1.15             | 43.67                  | 14.62           | 2.34             |
|            | Site 2 | 82.9                | 7.96             | 0.71             | 33.04                  | 18.61           | 1.33             |
|            | Site 3 | 81.65               | 8.11             | 1.42             | 36.68                  | 16.13           | 2.44             |
| <b>RN</b>  | Site 1 | 175.47              | 13.86            | 2.57             | 90.2                   | 30.97           | 4.96             |
|            | Site 2 | 175.23              | 12.31            | 0.93             | 110.47                 | 32.97           | 2.35             |
|            | Site 3 | 176.92              | 15.88            | 2.45             | 123.42                 | 33.61           | 5.07             |
| <b>SN</b>  | Site 1 | 197.29              | 14.71            | 2.42             | 105.84                 | 30.21           | 4.84             |
|            | Site 2 | 204.28              | 15.42            | 1.12             | 130.08                 | 30.28           | 2.17             |
|            | Site 3 | 206.2               | 16.99            | 2.56             | 134.85                 | 28.05           | 4.25             |
| <b>DN</b>  | Site 1 | 148.96              | 13.48            | 3.09             | 48.53                  | 29.62           | 5.08             |
|            | Site 2 | 156.97              | 15.74            | 1.15             | 102.54                 | 28.2            | 2.04             |
|            | Site 3 | 153.72              | 11.88            | 1.81             | 100.33                 | 24.02           | 3.62             |

12 CN (Caudate Nucleus), GP (Globus Pallidus), PUT (Putamen), THA (Thalamus), PT (Pulvinar  
 13 Thalamus), RN (Red Nucleus), SN (Substantia Nigra), DN (Dentate Nucleus), and ppb (parts per  
 14 billion) unit.

15

16

17 **Table S3.** Linear fitting equations for mean susceptibility ( $\chi$ ) (ppb) versus age for the global analysis.

|            | $\chi=A \times \text{age}+B$       | <b>Error in A<br/>(ppb/year)</b> | <b>Error in B<br/>(ppb)</b> | <i>r</i> | <i>r</i> -CI  | <i>p</i> -<br>value |
|------------|------------------------------------|----------------------------------|-----------------------------|----------|---------------|---------------------|
| <b>CN</b>  | $\chi=0.37 \times \text{age}+22$   | 0.07                             | 4.02                        | 0.39     | (0.33,0.46)   | <0.001              |
| <b>GP</b>  | $\chi=-0.05 \times \text{age}+124$ | 0.15                             | 8.75                        | -0.03    | (-0.11,0.05)  | 0.49                |
| <b>PUT</b> | $\chi=0.51 \times \text{age}+25$   | 0.11                             | 6.29                        | 0.35     | (0.28,0.42)   | <0.001              |
| <b>THA</b> | $\chi=-0.42 \times \text{age}+17$  | 0.04                             | 2.56                        | -0.60    | (-0.65,-0.55) | <0.001              |
| <b>PT</b>  | $\chi=-0.15 \times \text{age}+44$  | 0.11                             | 6.30                        | -0.11    | (-0.19,-0.03) | <0.01               |
| <b>RN</b>  | $\chi=1.41 \times \text{age}+23$   | 0.20                             | 11.56                       | 0.49     | (0.43,0.55)   | <0.001              |
| <b>SN</b>  | $\chi=0.92 \times \text{age}+71$   | 0.19                             | 10.91                       | 0.37     | (0.29,0.43)   | <0.001              |
| <b>DN</b>  | $\chi=1.4 \times \text{age}+9$     | 0.22                             | 13.12                       | 0.47     | (0.4,0.53)    | <0.001              |

18 *r*: Pearson correlation coefficient; *r*-CI: Confidence interval of *r*

19

20 **Table S4.** Linear fitting equations for global nuclei volume (V) (mm<sup>3</sup>) vs age.

|            | <b>V=A×age+B</b>    | <b>Error in A<br/>(mm<sup>3</sup>/year)</b> | <b>Error in<br/>B (mm<sup>3</sup>)</b> | <b>r</b> | <b>r-CI</b>   | <b>p-<br/>value</b> |
|------------|---------------------|---------------------------------------------|----------------------------------------|----------|---------------|---------------------|
| <b>CN</b>  | V = -6.78×age+2279  | 2.16                                        | 125.93                                 | -0.24    | (-0.32,-0.17) | <0.001              |
| <b>GP</b>  | V = -7.66×age+2303  | 2.05                                        | 119.42                                 | -0.29    | (-0.36,-0.21) | <0.001              |
| <b>PUT</b> | V = -18.8×age+4009  | 2.55                                        | 149.01                                 | -0.51    | (-0.56,-0.45) | <0.001              |
| <b>THA</b> | V = -14.72×age+4423 | 3.77                                        | 220.42                                 | -0.30    | (-0.37,-0.22) | <0.001              |
| <b>PT</b>  | V = -6.89×age+963   | 0.88                                        | 51.16                                  | -0.53    | (-0.58,-0.47) | <0.001              |
| <b>RN</b>  | V = -1.08×age+247   | 0.25                                        | 14.36                                  | -0.33    | (-0.4,-0.26)  | <0.001              |
| <b>SN</b>  | V = 2.14×age+367    | 0.64                                        | 37.39                                  | 0.26     | (0.18,0.33)   | <0.001              |
| <b>DN</b>  | V = 3.55×age+428    | 1.30                                        | 77.53                                  | 0.22     | (0.14,0.3)    | <0.001              |

21 *r*: Pearson correlation coefficient; *r*-CI: Confidence interval of *r*

22

23 **Table S5.** Linear fitting equations for volume (V) (mm<sup>3</sup>) vs. age for RII Analysis.

|            | <b>V=A×age+B</b>  | <b>Error in A<br/>(mm<sup>3</sup>/year)</b> | <b>Error in B<br/>(mm<sup>3</sup>)</b> | <b>r</b> | <b>r-CI</b>   | <b>p-<br/>value</b> |
|------------|-------------------|---------------------------------------------|----------------------------------------|----------|---------------|---------------------|
| <b>CN</b>  | V=-0.48×age+438   | 1.31                                        | 76.51                                  | -0.03    | (-0.11,0.05)  | 0.47                |
| <b>GP</b>  | V=-2.64×age+390   | 1.17                                        | 67.98                                  | -0.18    | (-0.26,-0.1)  | <0.001              |
| <b>PUT</b> | V=-1.33×age+543   | 1.82                                        | 106.68                                 | -0.06    | (-0.14,0.02)  | 0.15                |
| <b>THA</b> | V=-13.45×age+1997 | 2.46                                        | 143.80                                 | -0.40    | (-0.46,-0.33) | <0.001              |
| <b>PT</b>  | V=-0.39×age+108   | 0.66                                        | 37.38                                  | -0.06    | (-0.15,0.04)  | 0.24                |
| <b>RN</b>  | V=0.22×age+37     | 0.29                                        | 17.00                                  | 0.06     | (-0.02,0.15)  | 0.14                |
| <b>SN</b>  | V=1.71×age+44     | 0.61                                        | 35.65                                  | 0.22     | (0.15,0.3)    | <0.001              |
| <b>DN</b>  | V=3.04×age+30     | 1.31                                        | 79.14                                  | 0.20     | (0.11,0.28)   | <0.001              |

24 *r*: Pearson correlation coefficient; *r*-CI: Confidence interval of *r*

25

26

27 **Table S6.** Linear fitting equations for total iron (I) ( $\text{ppb} \times \text{mm}^3$ ) versus age for the global analysis.

|            | <b>I=A×age+B</b>     | <b>Error in A (in ppb×mm<sup>3</sup>/year)</b> | <b>Error in B (ppb)</b> | <b>r</b> | <b>r-CI</b>   | <b>p-value</b> |
|------------|----------------------|------------------------------------------------|-------------------------|----------|---------------|----------------|
| <b>CN</b>  | I=408.63×age+58384   | 162.41                                         | 9487.51                 | 0.20     | (0.12,0.27)   | <0.001         |
| <b>GP</b>  | I=-890.54×age+277111 | 406.45                                         | 23742.05                | -0.17    | (-0.25,-0.09) | <0.001         |
| <b>PUT</b> | I=531.96×age+123698  | 341.17                                         | 19928.81                | 0.12     | (0.04,0.2)    | <0.001         |
| <b>THA</b> | I=-1400.84×age+58884 | 155.84                                         | 9102.44                 | -0.58    | (-0.63,-0.53) | <0.001         |
| <b>PT</b>  | I=-330.82×age+39571  | 76.03                                          | 4436.17                 | -0.33    | (-0.4,-0.26)  | <0.001         |
| <b>RN</b>  | I=182.02×age+8691    | 44.86                                          | 2624.96                 | 0.31     | (0.23,0.38)   | <0.001         |
| <b>SN</b>  | I=675.86×age+22358   | 147.96                                         | 8658.07                 | 0.34     | (0.27,0.41)   | <0.001         |
| <b>DN</b>  | I=1075.62×age+-2236  | 225.04                                         | 13436.06                | 0.37     | (0.3,0.44)    | <0.001         |

28 *r*: Pearson correlation coefficient; *r*-CI: Confidence interval of *r*

29

30

31 **Table S7.** Linear fitting equations for total iron (I) (ppb × mm<sup>3</sup>) versus age for the RII analysis.

|            | <b>I=A×age+B</b>    | <b>Error in A<br/>(ppb×mm<sup>3</sup>/<br/>year)</b> | <b>Error in<br/>B (ppb)</b> | <b>r</b> | <b>r-CI</b>   | <b>p-value</b> |
|------------|---------------------|------------------------------------------------------|-----------------------------|----------|---------------|----------------|
| <b>CN</b>  | I=302.16×age+22850  | 138.77                                               | 8095.83                     | 0.17     | (0.09,0.25)   | <0.001         |
| <b>GP</b>  | I=-430.18×age+78979 | 281.71                                               | 16389.47                    | -0.13    | (-0.21,-0.04) | <0.001         |
| <b>PUT</b> | I=375.42×age+38454  | 250.61                                               | 14609.73                    | 0.12     | (0.04,0.2)    | <0.001         |
| <b>THA</b> | I=-510.21×age+64247 | 107.79                                               | 6293.19                     | -0.36    | (-0.42,-0.28) | <0.001         |
| <b>PT</b>  | I=-12.9×age+7265    | 52.65                                                | 2989.73                     | -0.02    | (-0.12,0.07)  | 0.63           |
| <b>RN</b>  | I=79.89×age+4110    | 54.28                                                | 3215.36                     | 0.13     | (0.04,0.21)   | <0.001         |
| <b>SN</b>  | I=420.72×age+5531   | 136.88                                               | 8025.78                     | 0.24     | (0.17,0.32)   | <0.001         |
| <b>DN</b>  | I=561.39×age+679    | 229.88                                               | 13894.25                    | 0.21     | (0.12,0.29)   | <0.001         |

32 *r*: Pearson correlation coefficient; *r*-CI: Confidence interval of *r*

33

34

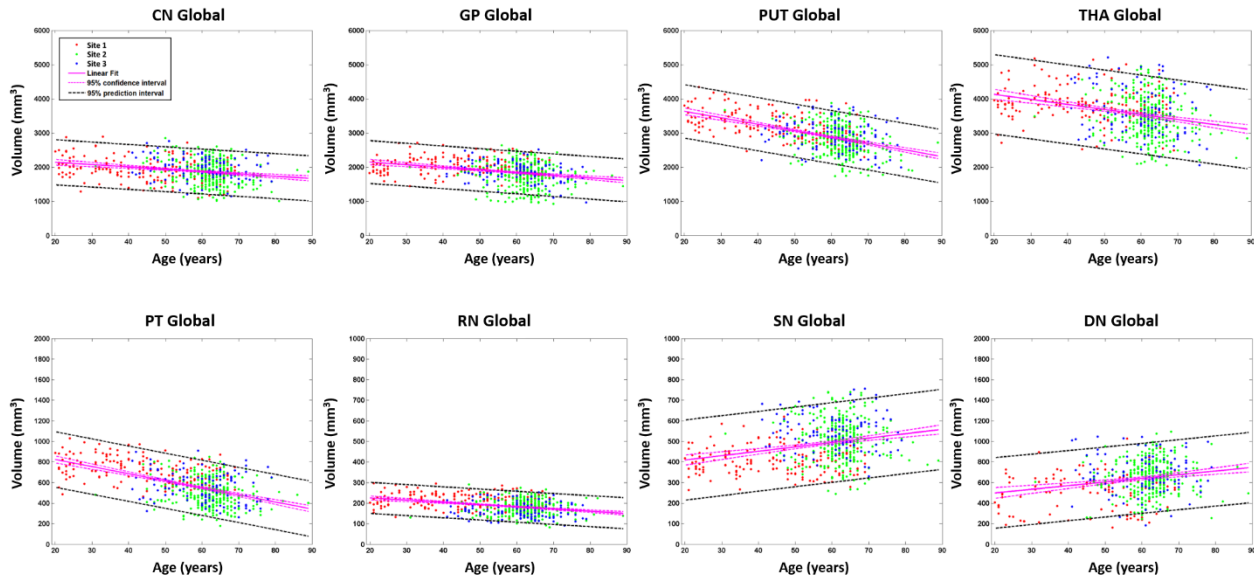

35

36 **Figure S1. Volumes for the global analysis.** The volumes (the average of the bilateral nuclei) and  
 37 95% confidence intervals and 95% prediction intervals are shown for each structure as a function of  
 38 age. CN: caudate nucleus, GP: globus pallidus, PUT: putamen, THA: thalamus, PT: pulvinar  
 39 thalamus, RN: red nucleus, SN: substantia nigra, DN: dentate nucleus.

40



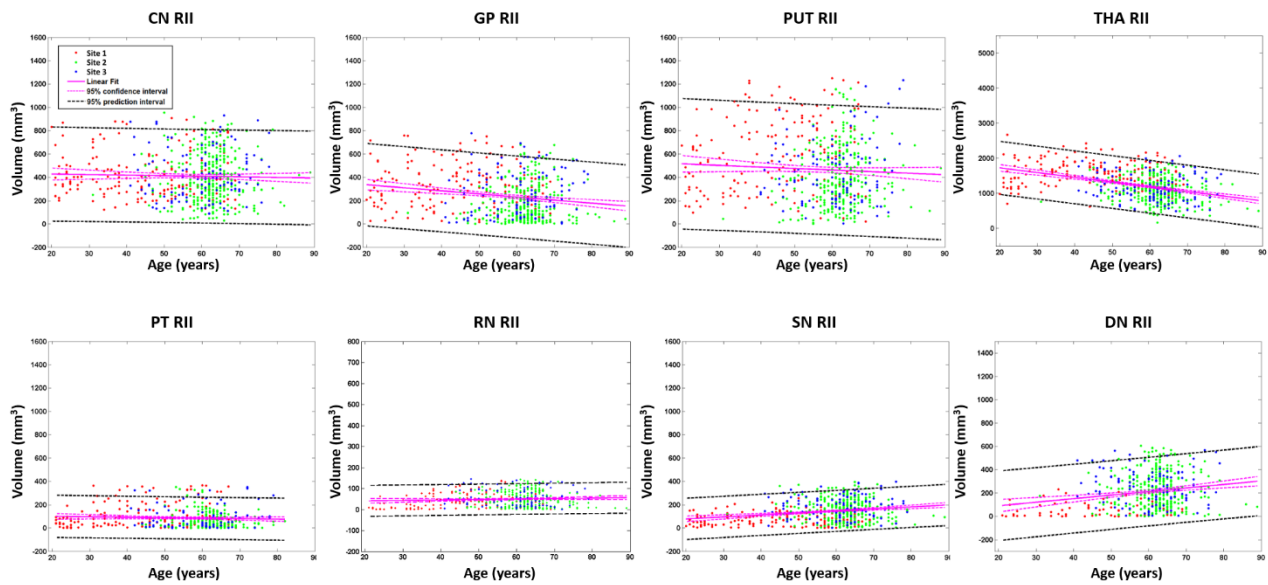

41

42 **Figure S2. Volumes for the RII analysis.** The volumes (the average of the bilateral nucleus) and  
 43 95% confidence intervals and 95% prediction intervals are shown for each structure as a function of  
 44 age. CN: caudate nucleus, GP: globus pallidus, PUT: putamen, THA: thalamus, PT: pulvinar  
 45 thalamus, RN: red nucleus, SN: substantia nigra, DN: dentate nucleus.

46

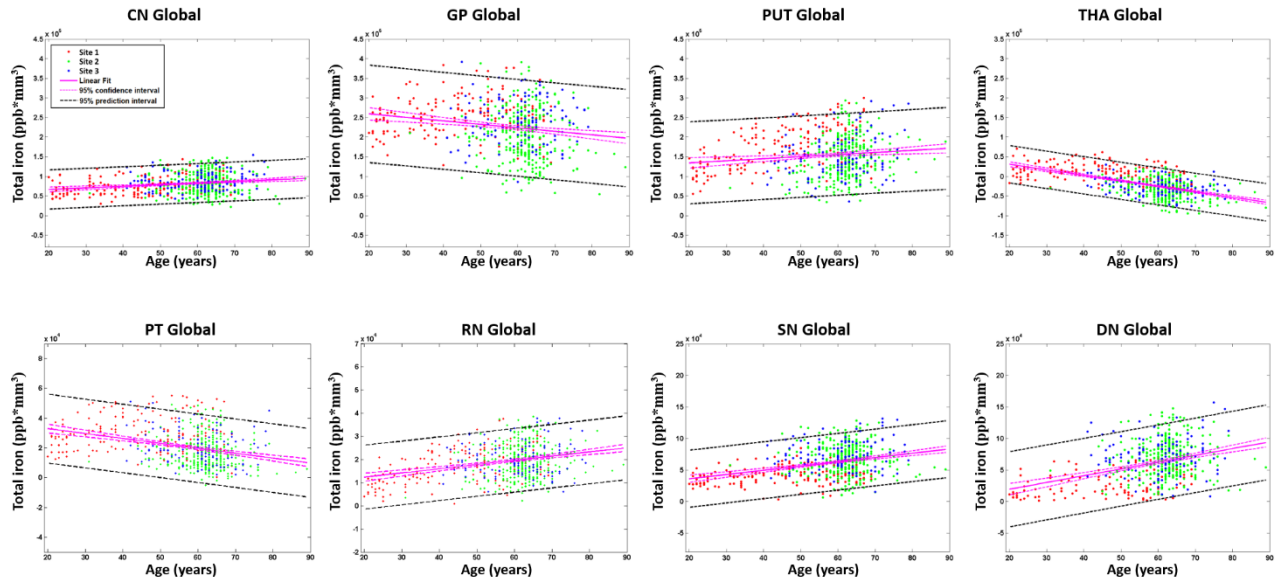

47

48 **Figure S3. Total iron content (ppb×mm<sup>3</sup>) from the global analysis.** The iron and 95% confidence  
 49 intervals and 95% prediction intervals are shown for each structure as a function of age. CN: caudate  
 50 nucleus, GP: globus pallidus, PUT: putamen, THA: thalamus, PT: pulvinar thalamus, RN: red  
 51 nucleus, SN: substantia nigra, DN: dentate nucleus.

52

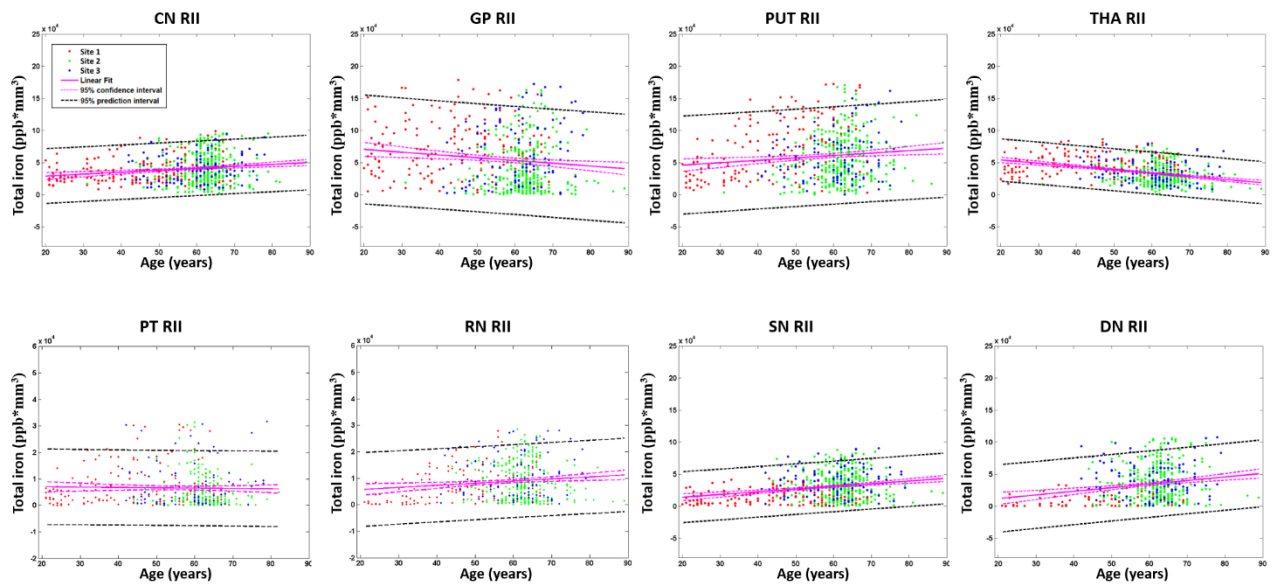

53

54 **Figure S4. Total iron (ppb $\times$ mm<sup>3</sup>) from the RII analysis.** The iron and 95% confidence intervals  
 55 and 95% prediction intervals are shown for each structure as a function of age. CN: caudate nucleus,  
 56 GP: globus pallidus, PUT: putamen, THA: thalamus, PT: pulvinar thalamus, RN: red nucleus,  
 57 SN: substantia nigra, DN: dentate nucleus.

58

59

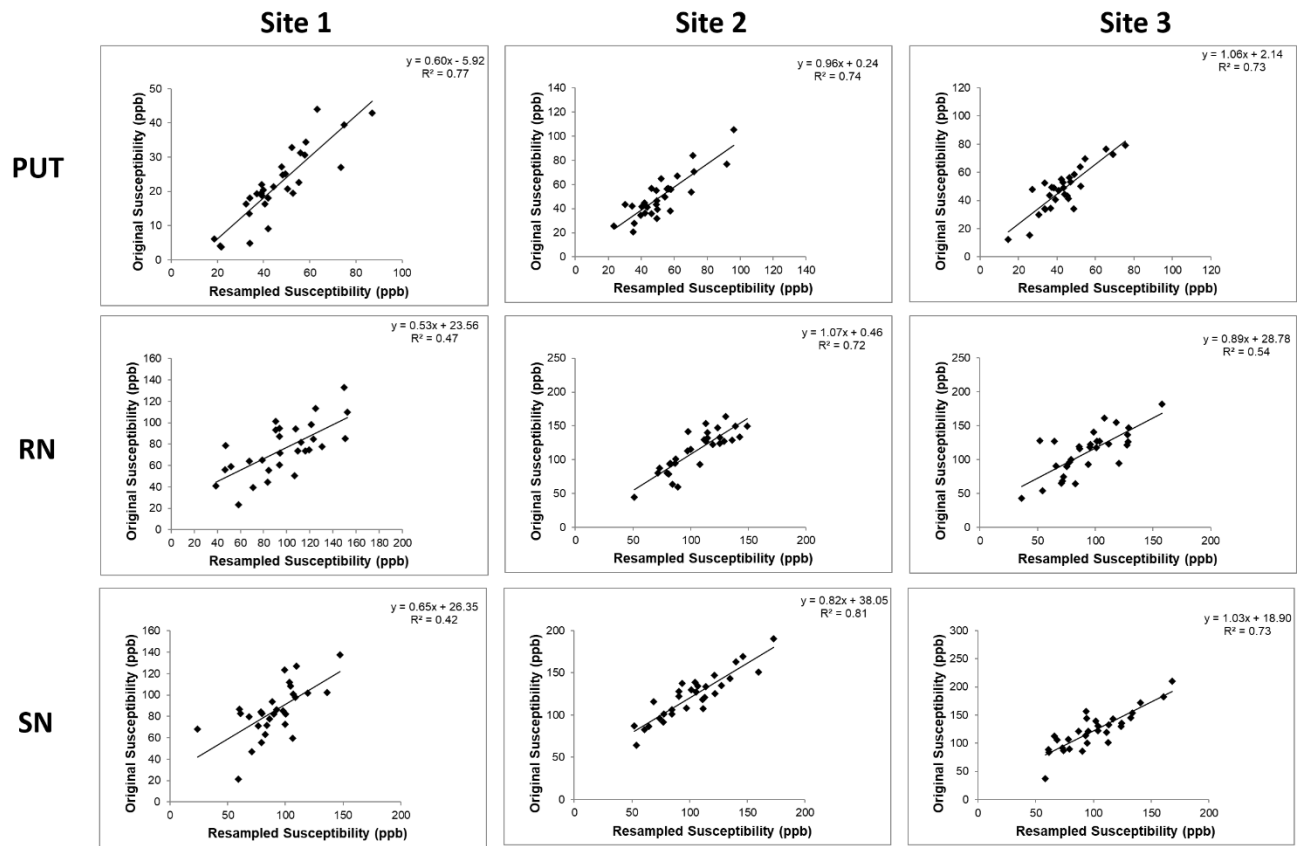

60

61 **Figure S5. Comparison of the iron content of the PUT, RN, and SN between the k-space**  
 62 **cropped lower resolution images and the original images. The ROI boundaries were redrawn in**  
 63 **the resampled images but the partial volume effect was not taken into account.**
